# Supplementary material for: Virus-Like Attachment Sites and Plastic CpG Islands: Landmarks of Diversity in Plant Del Retrotransposons
Source: PLOS journal article supplement (doi:10.1371/journal.pone.0097099), 2014-05-21

Additional file 3 – Figure S2

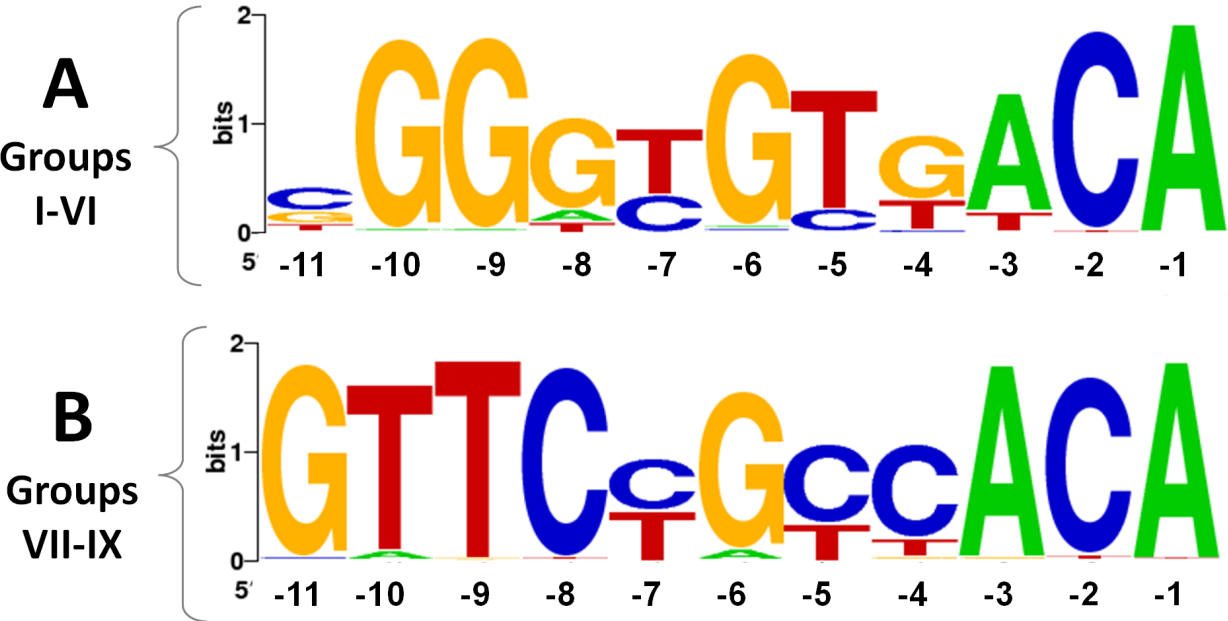

Supplement: S2 (10.1371/journal.pone.0097099.s002) [file journal.pone.0097099.s002]
